P1559

## Frailty is an independent predictor of one-year mortality in patients with ST-segment elevation myocardial infarction, regardless of age, clinical severity and left ventricular function

R. Arroyo Espliguero<sup>1</sup>, A. Silva-Obregon<sup>2</sup>, M.C. Viana-Llamas<sup>1</sup>, A. Estrella-Alonso<sup>2</sup>, S. Saboya-Sanchez<sup>3</sup>, G. Uribe-Heredia<sup>1</sup>, Z. Eguileor-Marin<sup>2</sup>, A. Castillo-Sandoval<sup>1</sup>, N. Arriero-Fernandez<sup>2</sup>, B. Garcia-Magallon<sup>1</sup>, C. Toran-Martinez<sup>1</sup>, C. Marian-Crespo<sup>2</sup>

<sup>1</sup>University Hospital, Cardiology, Guadalajara, Spain; <sup>2</sup>University Hospital of Guadalajara, Intensive Care Unit., Guadalajara, Spain; <sup>3</sup>University Hospital Puerta de Hierro Majadahonda, Intensive Care Unit, Madrid, Spain

**Background:** Frailty is characterized by decline in physiologic reserve and function leading to increased vulnerability. Sarcopenia, one of its features, has been associated with cardiac dysfunction.

**Purpose:** Assess frailty-based mortality in ST-segment elevation myocardial infarction (STEMI) patients following primary angioplasty.

**Methods:** Retrospective cohort of 427 consecutive STEMI patients (64 years [55–75]; 78% men) admitted to a general ICU between November-2013 and February-2017. We assessed frailty with the Clinical Frailty Scale (CFS). We used Kaplan-Meier and Cox regression models for survival analysis, stratified by CFS score categories (Figure). For clinical relevance, patients were dichotomized in robust (CFS 1–3) and vulnerable (CFS ≥4).

**Results:** Vulnerable patients were older, had more comorbidities and a higher GRACE 2.0. They had lower CK and albumin levels and higher BNP levels, despite the lack of frailty-based differences in LVEF and MI size and location. One-year mortality rate was higher in vulnerable patients (Table). After Cox regression analysis, vulnerable patients (CFS ≥4) showed a 3.37-fold higher risk of one-year mortality than robust ones (95% CI, 1.59–7.15; P=0.002), independently of age, gender, GRACE 2.0 or LVEF.

**Conclusions:** Frailty is an independent predictor of one-year mortality in STEMI patients, independently of age, clinical severity and ventricular function. Frailty assessment should be routinely included in the clinical examination and decision-making process of STEMI patients.

| Baseline characteristics               | Vulnerable (CFS ≥4)<br>(n=60) | Robust (CFS 1–3)<br>(n=367) | P value |
|----------------------------------------|-------------------------------|-----------------------------|---------|
| One-year mortality, n (%)              | 15 (25)                       | 14 (4.1)                    | <0.001  |
| Age (years)                            | 78 [67–85]                    | 61 [54–72]                  | <0.001  |
| Gender (women), n (%)                  | 28 (46.7)                     | 65 (17.7)                   | <0.001  |
| Hypertension, n (%)                    | 47 (78.3)                     | 156 (42.5)                  | <0.001  |
| Diabetes mellitus, n (%)               | 31 (51.7)                     | 79 (21.5)                   | <0.001  |
| GRACE 2.0                              | 150 [129–170.8]               | 112 [93–136]                | <0.001  |
| Left ventricular ejection fraction (%) | 52 [40–60]                    | 55 [45–60]                  | 0.151   |
| MI location (anterior), n (%)          | 26 (43.3)                     | 168 (45.8)                  | 0.781   |
| Creatin-phosphokinase (U/L)            | 921 [286.8–2072]              | 1496 [607–2786]             | 0.011   |
| High-sensitivity troponin I (pg/mL)    | 3699.5 [38–47968.1]           | 8789.8 [65.8–61970]         | 0.537   |
| B-natriuretic peptide (pg/mL)          | 267.9 [117.3–901.6]           | 104.3 [29.5–268.7]          | <0.001  |
| Albumin (g/L)                          | 34.9 [32.8–37.4]              | 38.4 [35.7–40.4]            | <0.001  |

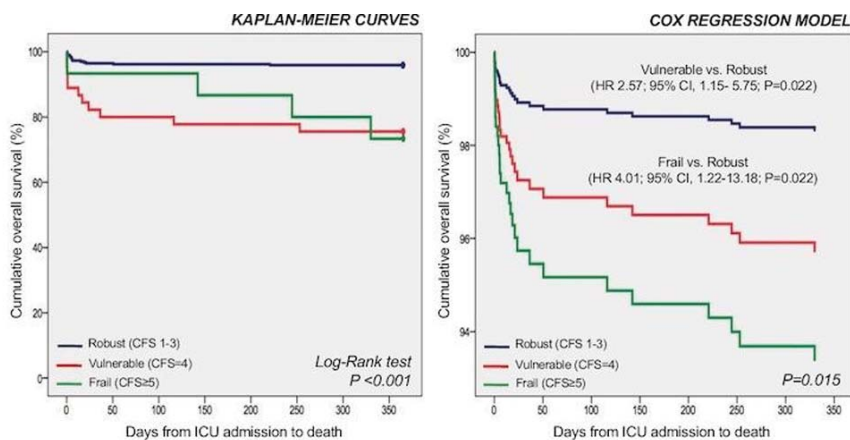

### Number at risk

|            |     |     |     |     |     |     |     |
|------------|-----|-----|-----|-----|-----|-----|-----|
| Robust     | 367 | 354 | 353 | 353 | 352 | 352 | 176 |
| Vulnerable | 45  | 36  | 36  | 35  | 35  | 34  | 17  |
| Frail      | 15  | 14  | 14  | 13  | 13  | 12  | 5.5 |

Kaplan-Meier and Cox survival curves.
